# Supplementary material for: Deciphering the molecular basis of mycobacteria and lipoglycan recognition by the C-type lectin Dectin-2
Source: PubMed Central journal article supplement (PMC6237770; doi:10.1038/s41598-018-35393-5), 2018-11-15
Supplement: 41598_2018_35393_MOESM1_ESM.pdf [file 41598_2018_35393_MOESM1_ESM.pdf]

## SUPPLEMENTARY FIGURES for

### Deciphering the molecular basis of mycobacteria and lipoglycan recognition

#### by the C-type lectin Dectin-2

Alexiane Decout, Sandro Silva-Gomes, Daniel Drocourt, Emilyne Blattes, Michel Rivière, Jacques Prandi, Gérald Larrouy-Maumus, Anne-Marie Caminade, Beston Hamasur, Gunilla Källenius, Devinder Kaur, Karen M. Dobos, Megan Lucas, Iain C. Sutcliffe, Gurdyal S. Besra, Ben J. Appelmelk, Martine Gilleron, Mary Jackson, Alain Vercellone, Gérard Tiraby & Jérôme Nigou

#### Figure S1. Structures of the lipoglycans (A) and mannodendrimers (B) used in this study.

A) The correspondence between the structures and the symbols is shown for SaeLM.

B) Only one of the six branches substituting the N3P3 core is represented.

#### Figure S2. Dectin-2 agonist activity in LM Mtb and 19 kDa MLP fractions relies on ManLAM.

A, C, D) NF- $\kappa$ B activation induced by LM Mtb and 19 kDa MLP fractions in HEK-Dectin-2 or HEK-TLR2 cells. Mannoconjugates (from 1 to 1000 ng in A; from 300 to 10 ng in C; from 20 to 0.2 ng in D) were tested for their capacity to induce NF- $\kappa$ B activation in HEK-Dectin-2 (A) or HEK-TLR2 (C, D) cells. Conditions are the same as in Figure 2. - ManLAM, ManLAM-depleted.

B) Monosaccharide analysis of LM Mtb fraction. Partial capillary electropherograms of APTS derivatives of monosaccharides obtained from total acid hydrolysis of ManLAM Mtb (trace a) and LM Mtb (trace b). Peaks: Ara\*, arabinose-APTS; Man\*, mannose-APTS; C7\*, internal standard, mannoheptose-APTS.

**Figure S3. Generation of a *pimE* knock-out mutant of *M. tuberculosis* H37Rv (A) and analysis of phosphatidyl-*myo*-inositol mannosides composition (B).**

A) Allelic replacement was confirmed by PCR using the set of primers (Rv1159.1 and Rv1159.2; see Materials and Methods for details). The wild-type 1,295 bp amplification signal (wt) is replaced by a 1,526-bp amplification signal in the mutant clones ( $\Delta$ ) due to the insertion of a 1.2 kb- kanamycin resistance cassette between the two *Sma*I restriction sites of *pimE*.

B) Negative ion mode MALDI-MS spectra of the total lipids from WT Mtb H37Rv and its *pimE* mutant (H37Rv  $\Delta$ *pimE*). PIM<sub>2</sub>, PIM<sub>4</sub>, PIM<sub>6</sub>, phosphatidyl-*myo*-inositol di-, tetramannosides; PIM<sub>6</sub>: phosphatidyl-*myo*-inositol hexamannosides; Ac<sub>1</sub>PIM, acylated PIM (3 acyl chains in total); Ac<sub>2</sub>PIM, di-acylated PIM (4 acyl chains in total).

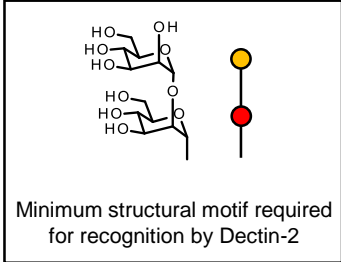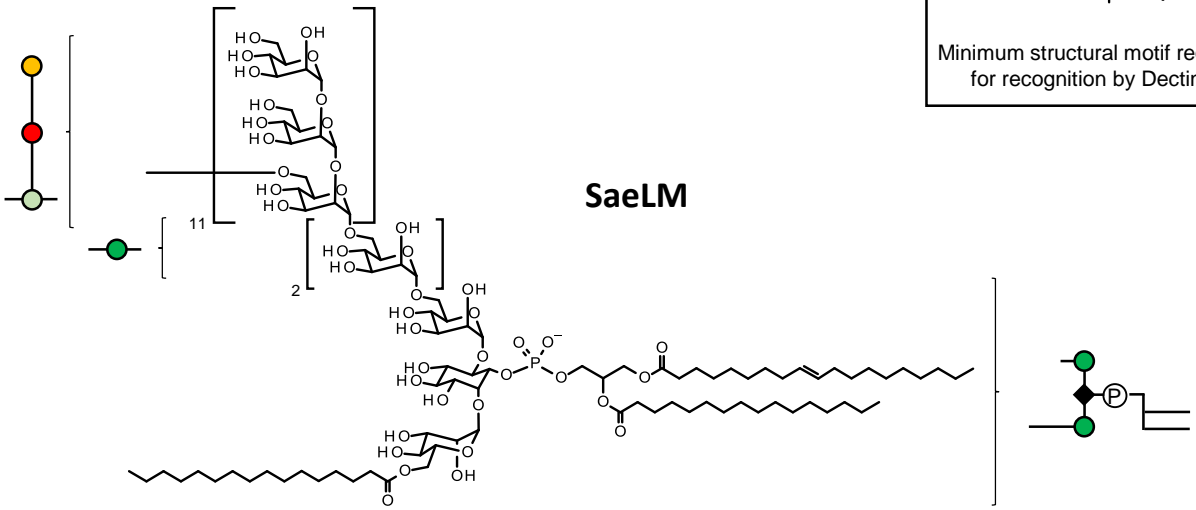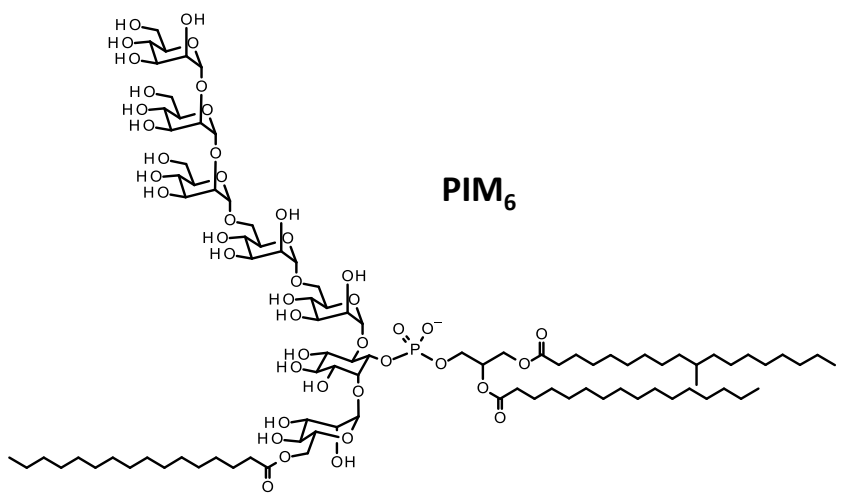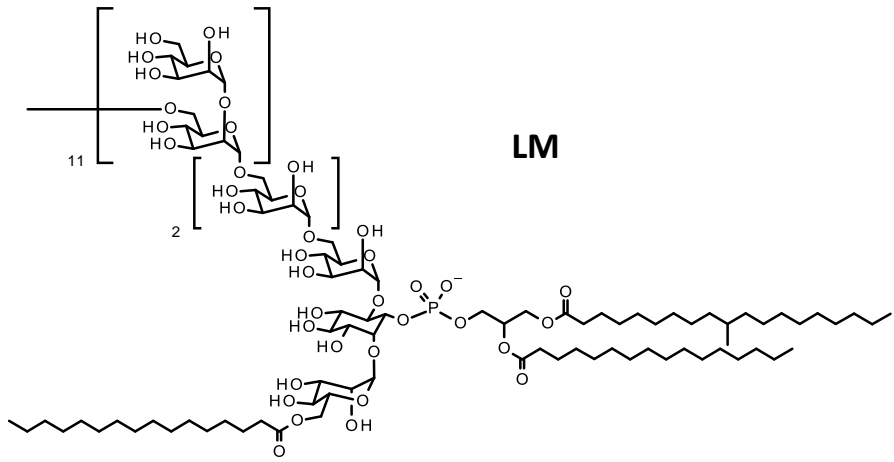

**Fig. S1A**

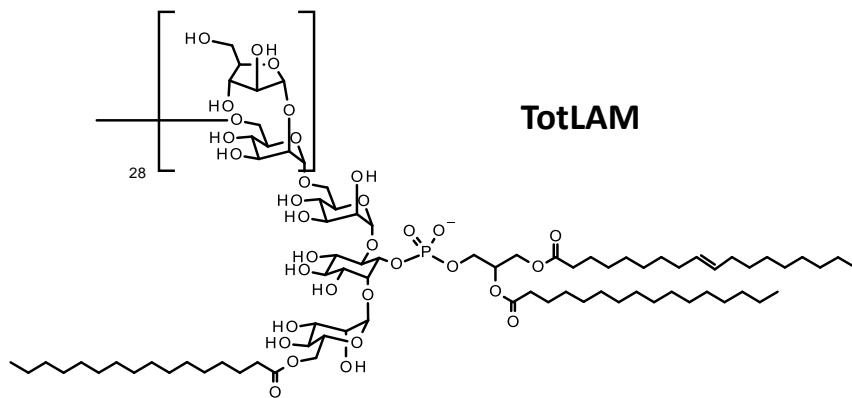

**ManLAM WT**

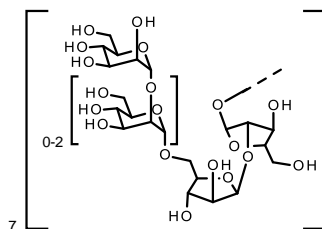

**ManLAM  $\Delta$ Rv2181**

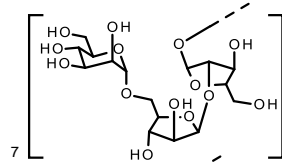

**ManLAM  $\Delta$ Rv1635c  
AraLAM**

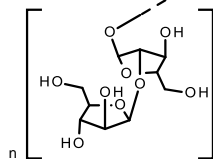

**PILAM**

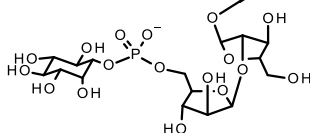

**TpaLAM**

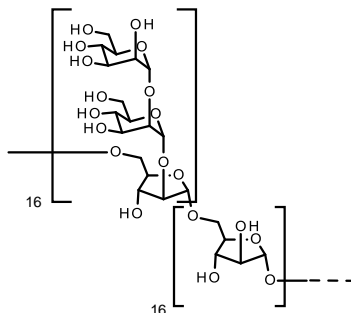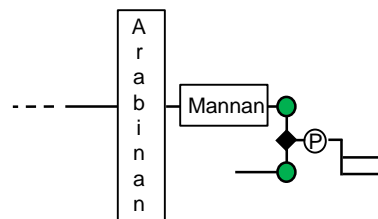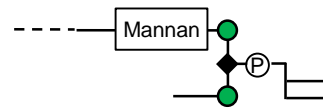

**Fig. S1A (continues)**

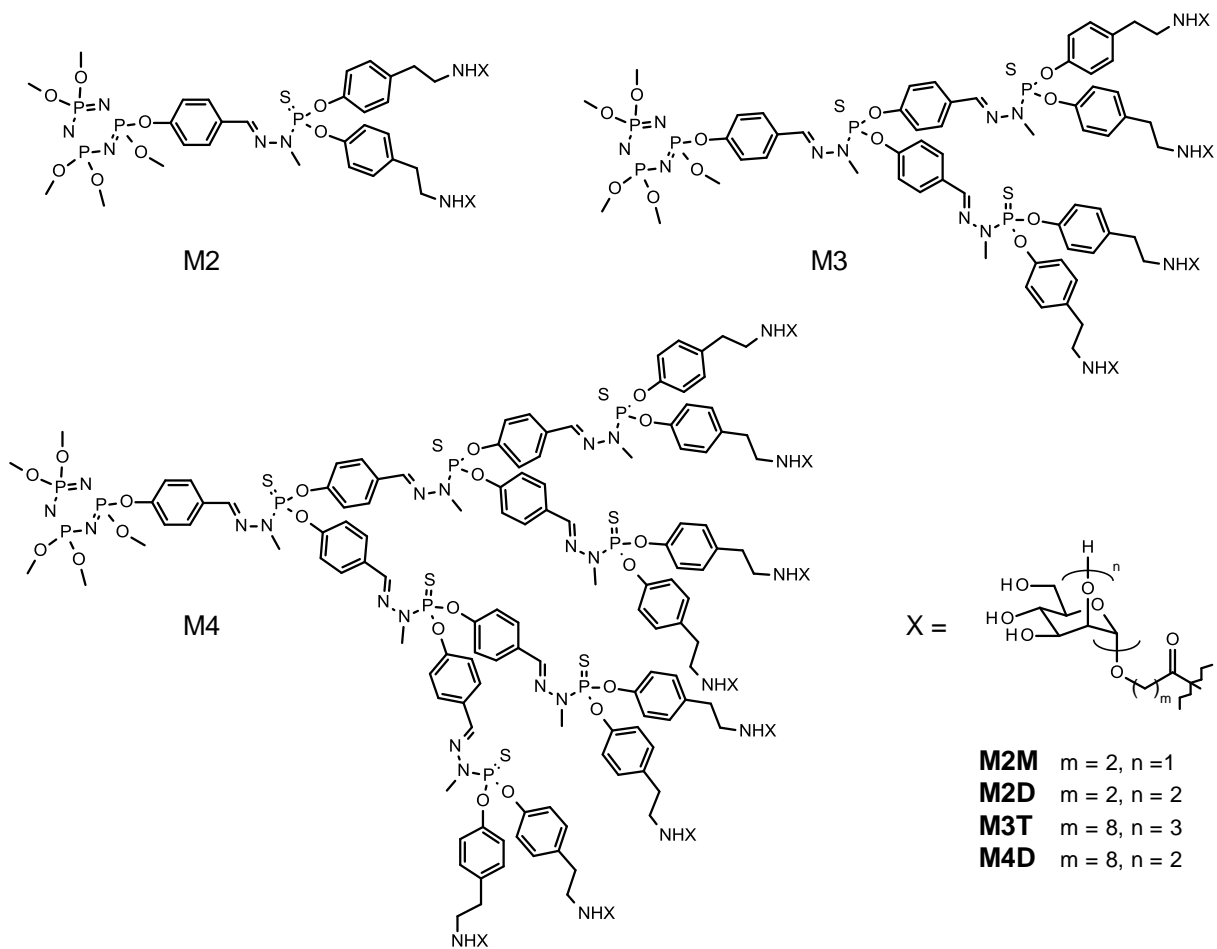

**Fig. S1B**

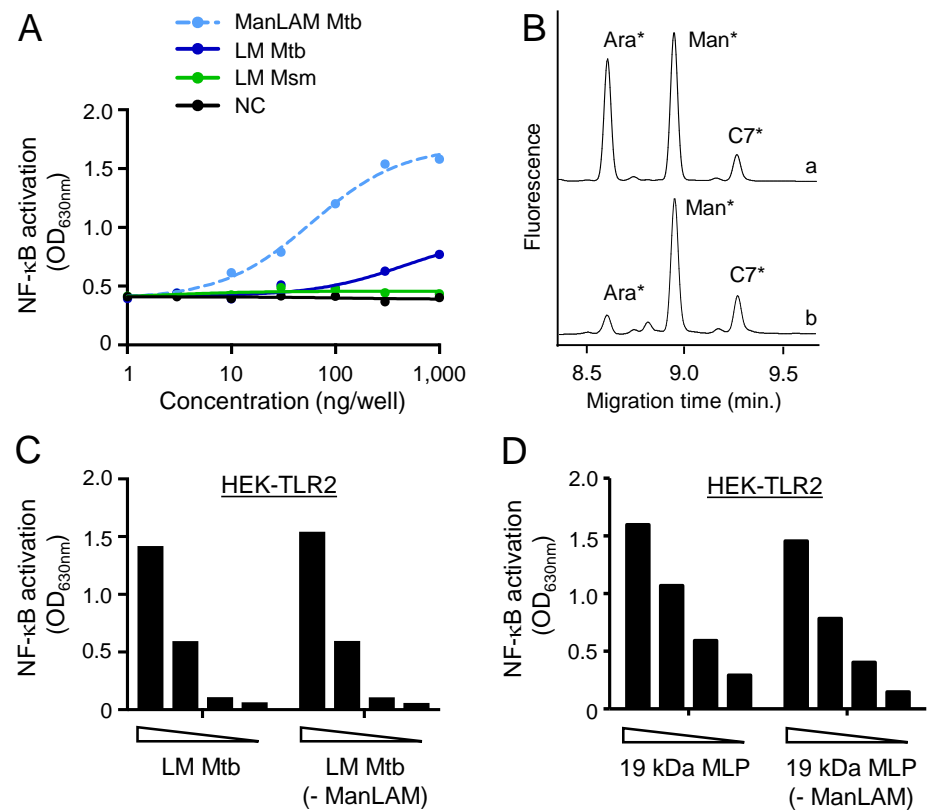

Fig S2

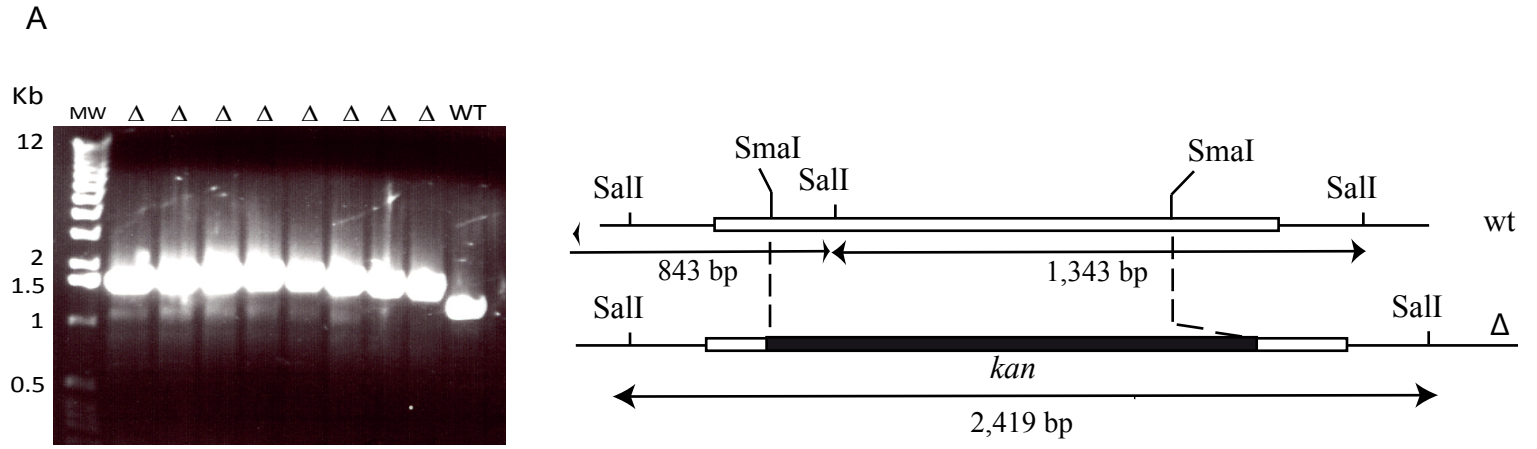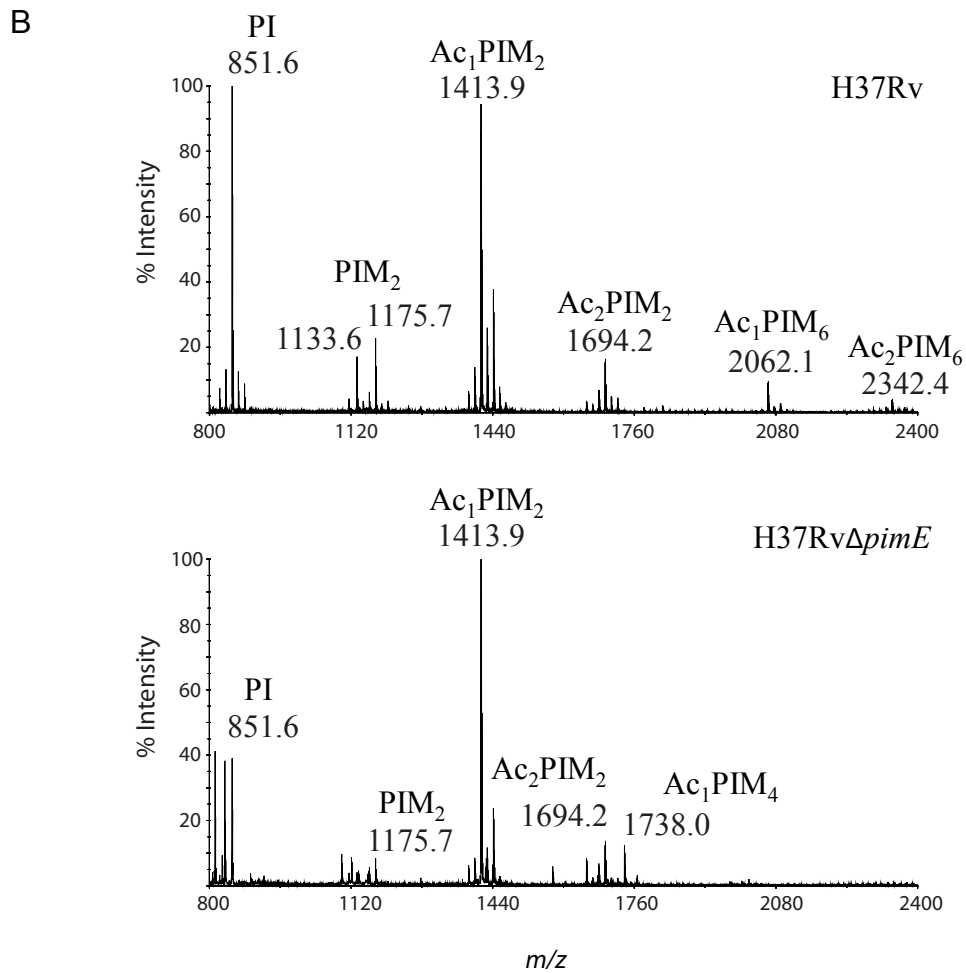

**Fig. S3**
